# Supplementary material for: Impact of Global Warming on Kryal Fauna: Thermal Tolerance Response of Diamesa steinboecki (Goetghebuer, 1933; Chironomidae)
Source: MDPI journal article supplement (doi:10.3390/d15060708), 2023-05-26
Supplement: s1 [file s1]

| Gene                   | Forward                    | Reverse                  | Efficiency (%) | Reference                  |
|------------------------|----------------------------|--------------------------|----------------|----------------------------|
| <i>Actin</i>           | 5' CTGCCTCAACCTCATTGGA     | 5'TGGTTGTAGACGGTTTCGTG   | <b>99.5</b>    | Bernabò et al., 2020       |
| <i>Hsp70</i>           | 5'TTGGGGACGACATACTCATGT    | 5'ACCGCTTGCATCAAAAACACTG | <b>86.5</b>    | Bernabò et al., 2020       |
| <i>Hsp70 no intron</i> | 5'CAAAAATCAAGTGGCAATGAATCC | 5'TGAACTGACTTCTTCTGGAGC  | <b>83.5</b>    | Bernabò et al., 2020       |
| <i>Cyp450</i>          | 5'GACATTGATGAGAATGATGTTGGT | 5'TAAGTGGAAGTGGTGGGTACA  | <b>121.5</b>   | Park et al., 2009          |
| <i>Hsc70 (4)</i>       | 5'CGTGCTATGACTAAGGACAA     | 5'GCTTCATTGACCATACGTTC   | <b>87</b>      | Martín-Folgar et al., 2018 |

Table S1. Sequences of the primers and reference used in this study and their efficiencies obtained for *D. steinboeckii*

References:

Bernabò, P;Viero, G; Lencioni, V. A long noncoding RNA acts as a posttranscriptional regulator of heat shock protein (HSP70) synthesis in the cold hardy *Diamesa tonsa* under heat shock. *PLoS ONE*, 2020, *15*(4), 1–18.

Martín-Folgar, R; Aquilino, M;Ozáez, I;Martínez-Guitarte, J. L. Ultraviolet filters and heat shock proteins: effects in *Chironomus riparius* by benzophenone-3 and 4-methylbenzylidene camphor., *Enviro Sci & Pollution Res*, 2018, *25*(1), 333–344.

Park, K; Bang, H.W; Park, J; Kwak, I.-S. Ecotoxicological multilevel-evaluation of the effects of fenbendazole exposure to *Chironomus riparius* larvae. *Chemosphere*, 2009, *77*, 359–367.
